# Supplementary material for: Population Pharmacokinetic Modeling of Olaratumab, an Anti-PDGFRα Human Monoclonal Antibody, in Patients with Advanced and/or Metastatic Cancer
Source: PubMed Central journal article supplement — Clin Pharmacokinet. 2017 Jun 15;57(3):355–65. doi: 10.1007/s40262-017-0562-0 (PMC5814542; doi:10.1007/s40262-017-0562-0), 2017-06-15

### Non-Small Cell Lung Cancer

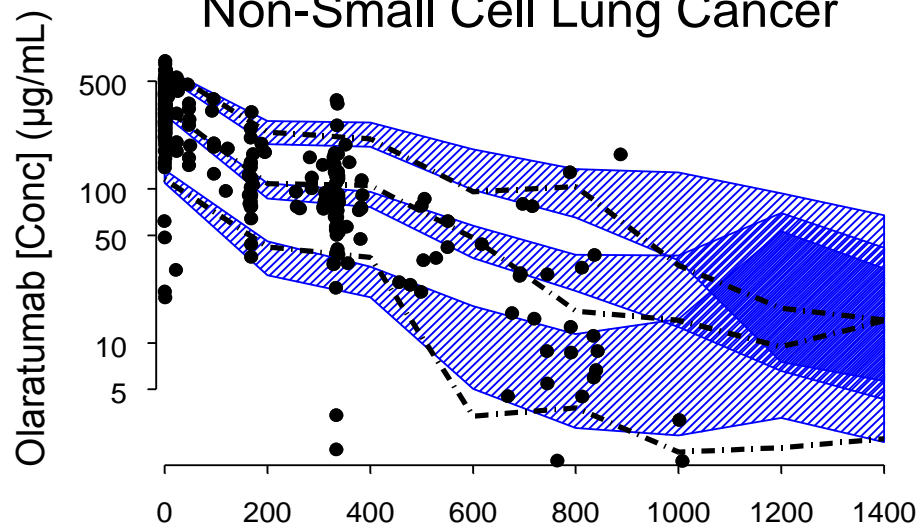

### Glioblastoma Multiforme

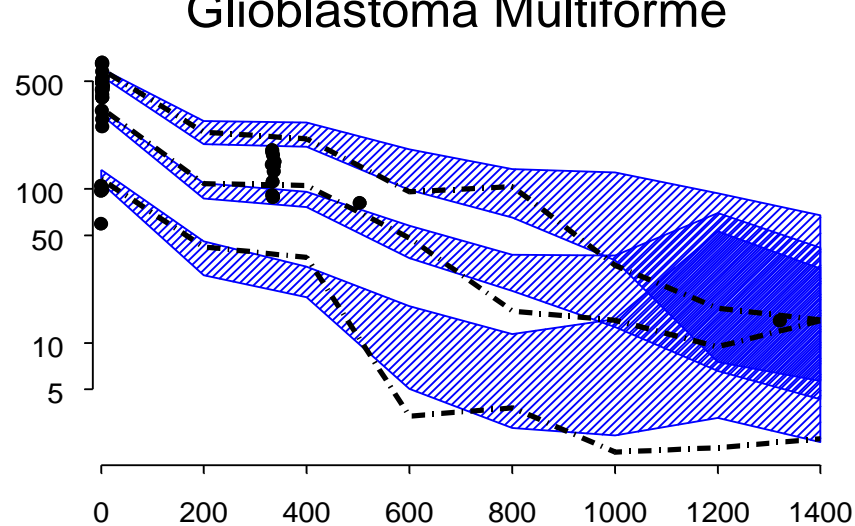

### Soft Tissue Sarcoma

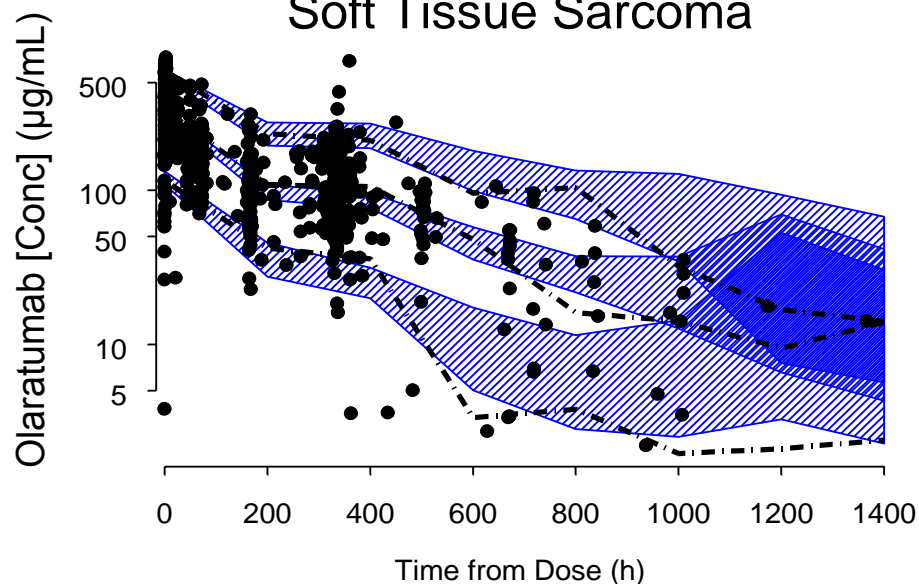

### Gastrointestinal Stromal Tumor

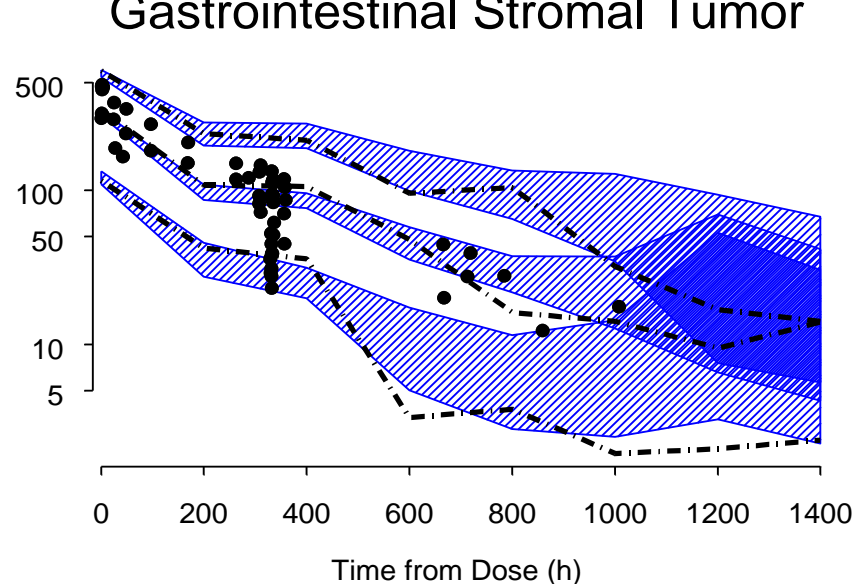

Supplement: 40262_2017_562_MOESM3_ESM.pdf [file 40262_2017_562_MOESM3_ESM.pdf]
