# Supplementary figures and images for: Population Pharmacokinetic Modeling of Olaratumab, an Anti-PDGFRα Human Monoclonal Antibody, in Patients with Advanced and/or Metastatic Cancer
Source: PubMed Central journal article supplement — Clin Pharmacokinet. 2017 Jun 15;57(3):355–65. doi: 10.1007/s40262-017-0562-0 (PMC5814542; doi:10.1007/s40262-017-0562-0), 2017-06-15

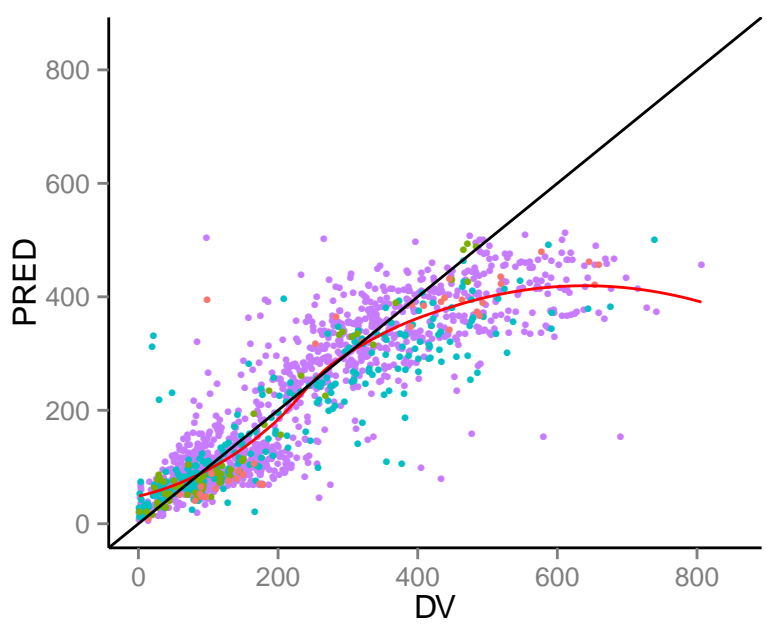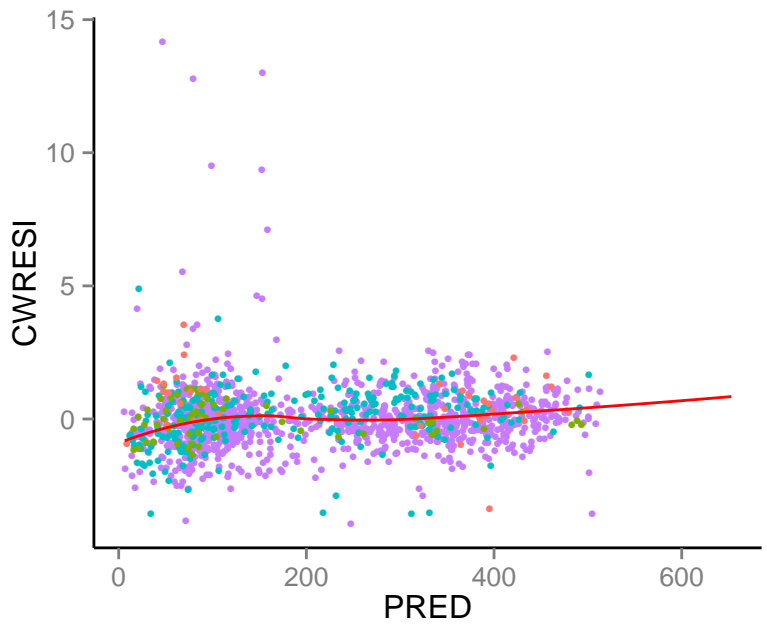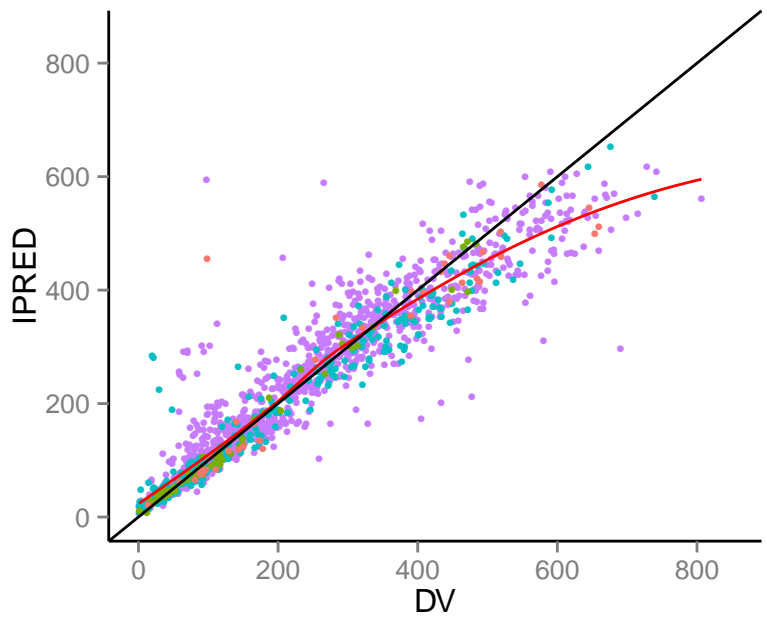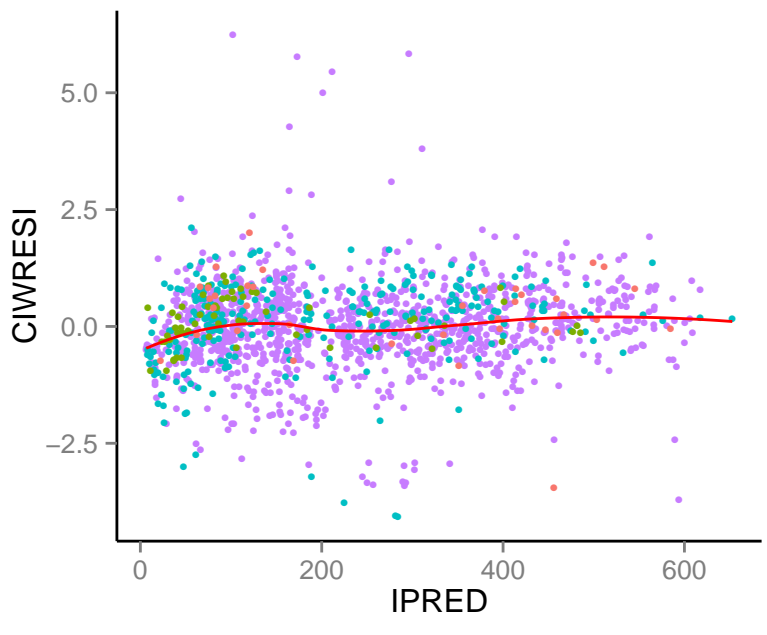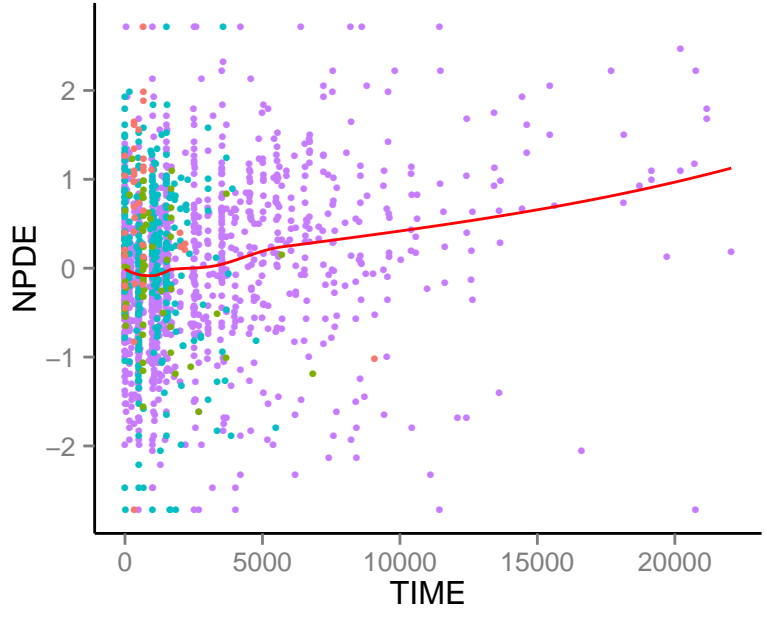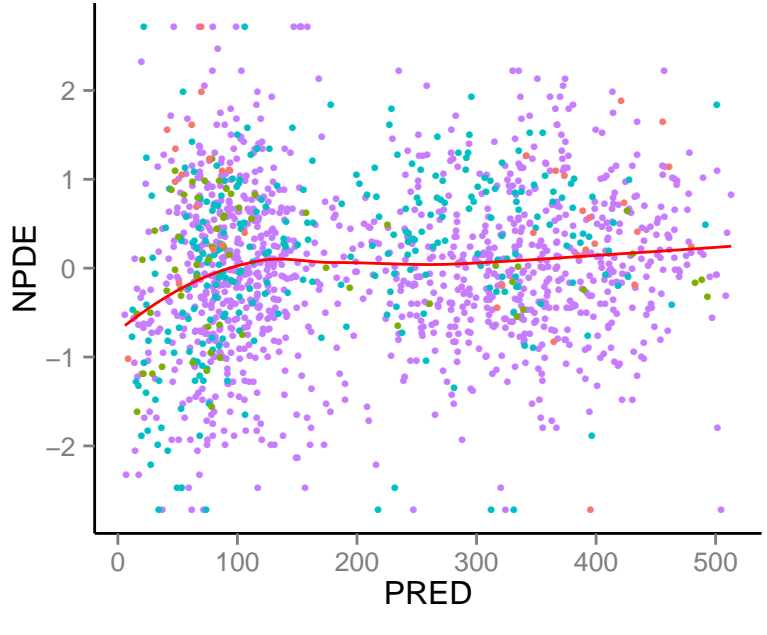

**STUDY** ● GBM ● GIST ● NSCLC ● STS

Supplement: 40262_2017_562_MOESM1_ESM.pdf [file 40262_2017_562_MOESM1_ESM.pdf]

### Base Population PK Model without Covariates

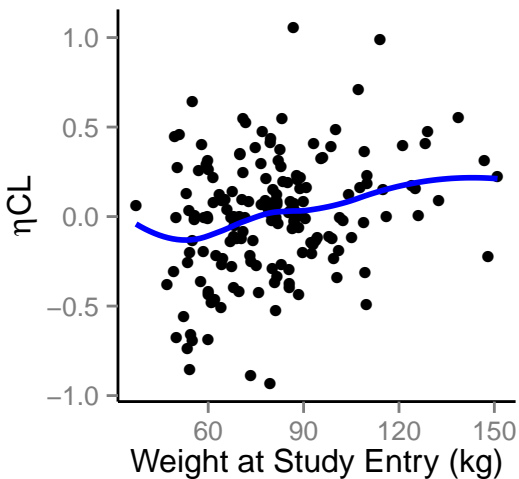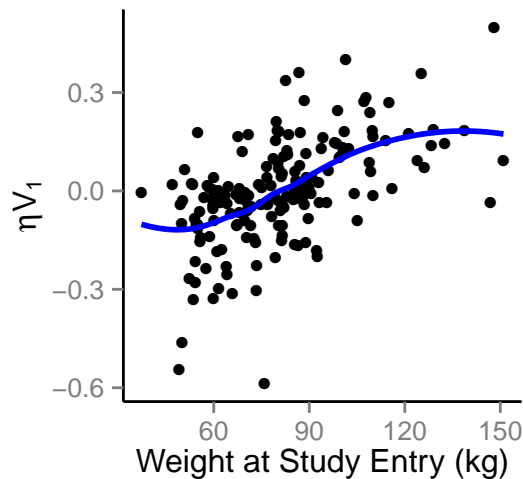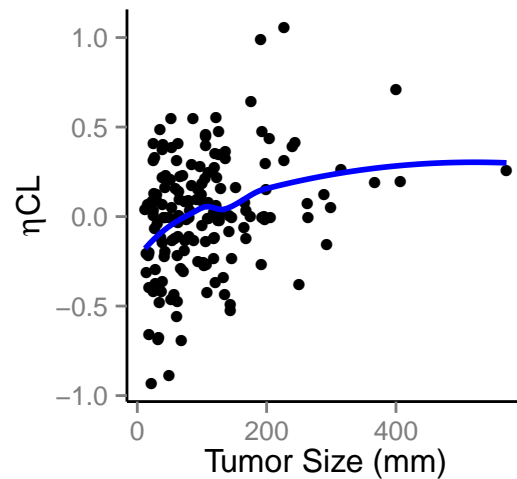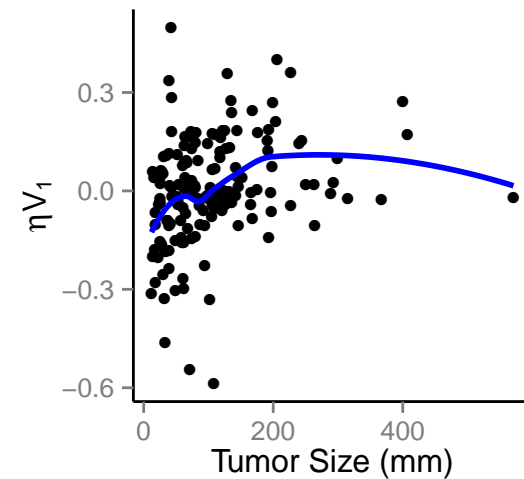

### Final Population PK Model with Covariates

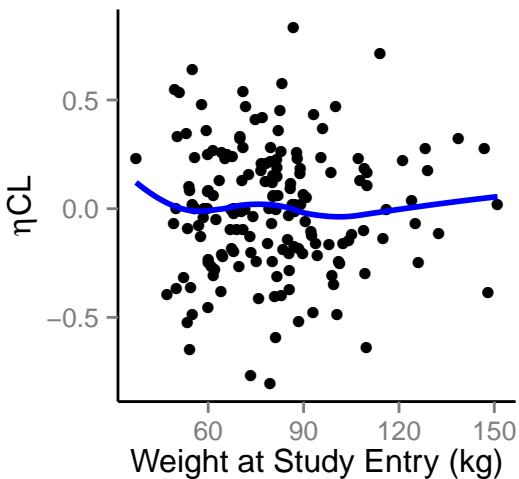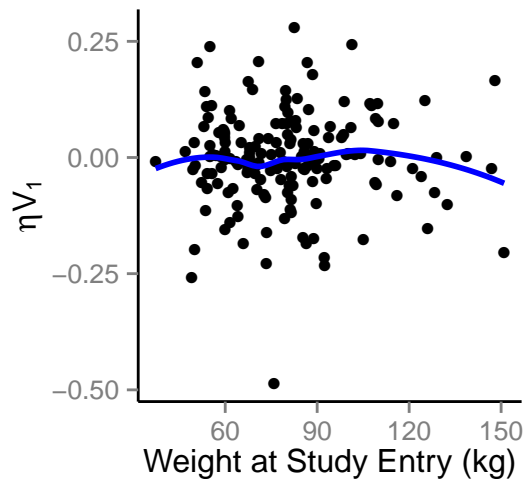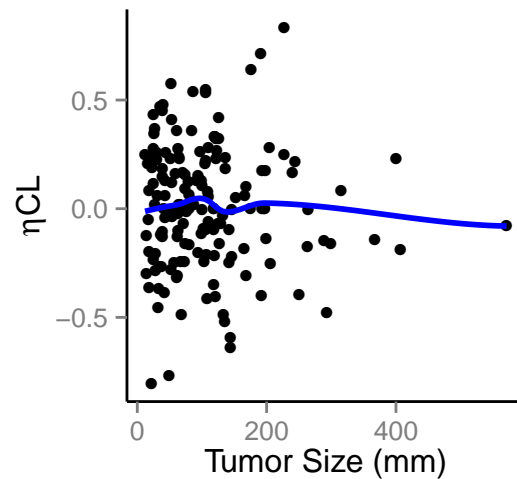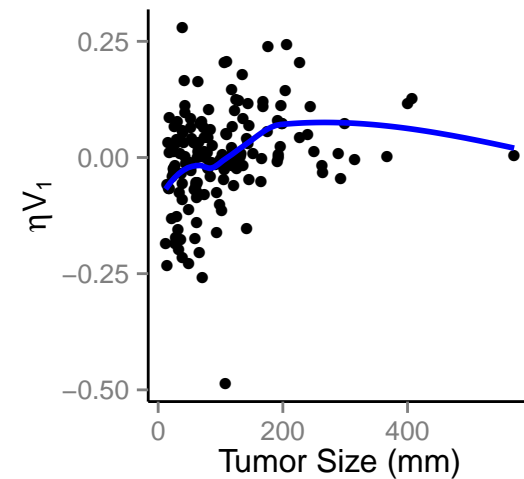

Supplement: 40262_2017_562_MOESM2_ESM.pdf [file 40262_2017_562_MOESM2_ESM.pdf]
